# Supplementary material for: Molecular analysis of homeostatic iron regulator, transmembrane protease serine-6, and BTB domain-containing protein-9 variants and iron parameters in blood donors
Source: PubMed Central journal article supplement (PMC7809544; doi:10.1042/bsr20202584), 2021-01-14
Supplement: BSR-2020-2584_supp.pdf [file BSR-2020-2584_supp.pdf]

**Table S1. Hematological results of the study participant**

|              | Overall |      | Distribution |       | Sex   |      |       |      | P-value | Age*  |      |       |      | P-value | Number of donations |      |          |       | P-value |
|--------------|---------|------|--------------|-------|-------|------|-------|------|---------|-------|------|-------|------|---------|---------------------|------|----------|-------|---------|
|              | Total   |      | Skew         | Kur   | Women |      | Men   |      |         | <30 y |      | ≥30 y |      |         | Once                |      | ≥2 times |       |         |
|              | (n=197) |      |              |       | Mean  | SD   | Mean  | SD   |         | Mean  | SD   | Mean  | SD   |         | Mean                | SD   | Mean     | SD    |         |
| HEP<br>pg/mL | 539     | 623  | 1.28         | 2.76  | 541   | 870  | 539   | 596  | 0.693   | 580.6 | 645  | 493   | 598  | 0.264   | 936                 | 483  | 1021.7   | 625.8 | 0.781   |
| FER<br>ng/mL | 33.4    | 47.6 | 1.81         | 3.78  | 31.9  | 46.2 | 33.5  | 47.9 | 0.629   | 29.4  | 37.9 | 37.9  | 56.4 | 0.968   | 61.6                | 49.2 | 58.1     | 54.4  | 0.500   |
| H/F          | 15.6    | 32.1 | 5.14         | 37.7  | 7.2   | 10.5 | 16.4  | 33.5 | 0.269   | 20.2  | 40.9 | 10.4  | 16.7 | 0.097   | 23.7                | 28.0 | 35.9     | 51.8  | 0.171   |
| WBC          | 6.5     | 1.9  | 1.11         | 1.79  | 5.5   | 2.5  | 6.6   | 1.9  | 0.152   | 6.4   | 1.5  | 6.7   | 2.4  | 0.363   | 6.8                 | 2.0  | 6.3      | 2.0   | 0.274   |
| LYM          | 2.7     | 0.7  | 0.76         | 0.34  | 2.6   | 0.6  | 2.7   | 0.7  | 0.567   | 2.7   | 0.7  | 2.8   | 0.8  | 0.537   | 2.6                 | 0.7  | 2.8      | 0.8   | 0.173   |
| MID          | 0.8     | 0.3  | 1.31         | 2.33  | 0.6   | 0.3  | 0.8   | 0.3  | 0.189   | 0.7   | 0.2  | 0.9   | 0.4  | 0.232   | 0.8                 | 0.3  | 0.8      | 0.3   | 0.261   |
| GRA          | 3.0     | 1.4  | 1.19         | 1.58  | 2.3   | 2.0  | 3.1   | 1.3  | 0.172   | 3.0   | 1.1  | 3.1   | 1.6  | 0.588   | 3.3                 | 1.4  | 2.7      | 1.4   | 0.035   |
| LYM%         | 42.5    | 10.5 | -0.29        | 0.40  | 49.8  | 12.4 | 42.0  | 10.2 | 0.056   | 42.0  | 10.4 | 43.2  | 10.7 | 0.588   | 39.2                | 11.1 | 46.2     | 8.6   | 0.001   |
| MID%         | 12.0    | 3.1  | 1.33         | 2.28  | 11.8  | 2.4  | 12.0  | 3.2  | 0.957   | 11.6  | 2.7  | 12.5  | 3.6  | 0.378   | 12.2                | 3.4  | 12.1     | 2.9   | 0.817   |
| GRA%         | 45.1    | 9.8  | 0.02         | -0.86 | 38.4  | 12.4 | 45.6  | 9.4  | 0.061   | 45.6  | 9.9  | 44.4  | 9.6  | 0.526   | 47.7                | 9.5  | 41.7     | 9.2   | 0.003   |
| RBC          | 4.2     | 0.5  | -0.02        | 0.10  | 4.1   | 0.3  | 4.2   | 0.5  | 0.530   | 4.2   | 0.4  | 4.2   | 0.6  | 0.643   | 4.3                 | 0.5  | 4.1      | 0.5   | 0.182   |
| HB g/dL      | 12.7    | 1.5  | -0.45        | -0.28 | 12.6  | 1.1  | 12.7  | 1.5  | 0.884   | 12.5  | 1.4  | 13.0  | 1.6  | 0.131   | 13.0                | 1.4  | 12.4     | 1.6   | 0.071   |
| HCT          | 35.1    | 3.9  | -0.32        | 0.15  | 34.7  | 2.5  | 35.1  | 4.0  | 0.769   | 34.7  | 3.7  | 35.5  | 4.2  | 0.306   | 35.6                | 3.6  | 34.1     | 4.2   | 0.076   |
| MCV          | 83.7    | 6.2  | -1.11        | 3.00  | 84.8  | 4.0  | 83.7  | 6.4  | 0.656   | 83.1  | 5.3  | 84.5  | 7.2  | 0.142   | 83.9                | 6.0  | 83.1     | 6.8   | 0.618   |
| MCH          | 30.4    | 2.4  | -1.38        | 2.92  | 30.9  | 1.7  | 30.3  | 2.5  | 0.685   | 30.0  | 2.1  | 30.9  | 2.7  | 0.003   | 30.5                | 2.3  | 30.2     | 2.7   | 0.531   |
| MCHC         | 36.3    | 1.0  | 0.07         | -0.14 | 36.4  | 0.8  | 36.2  | 1.0  | 0.615   | 36.0  | 0.9  | 36.5  | 1.1  | 0.018   | 36.4                | 1.0  | 36.3     | 1.1   | 0.639   |
| RDW          | 13.9    | 1.0  | 2.31         | 8.73  | 13.5  | 0.4  | 14.0  | 1.0  | 0.176   | 13.9  | 0.9  | 14.0  | 1.1  | 0.694   | 14.0                | 1.1  | 13.9     | 0.9   | 0.525   |
| PLT          | 205     | 68.9 | -0.15        | 0.41  | 244.4 | 97.1 | 202.9 | 66.1 | 0.125   | 210.4 | 75.7 | 200.0 | 59.6 | 0.457   | 207.0               | 70.2 | 204.0    | 70.9  | 0.843   |
| MPV          | 8.8     | 0.7  | 0.38         | 0.19  | 8.4   | 0.8  | 8.8   | 0.7  | 0.197   | 8.7   | 0.6  | 8.9   | 0.9  | 0.242   | 8.6                 | 0.7  | 9.0      | 0.8   | 0.015   |

Data are represented as mean and standard deviation (SD). Skewness (skew) and kurtosis (Kur) coefficients are considered acceptable between -2 and +2. In this case, a student t-test was applied. Otherwise, the Mann-Whitney U test was used.\*The age of 30 years cut off was selected based on the mean age of the study participants. P<0.05 was set to be statistically significant. HEP: hepcidin, FER: ferritin, H/F: hepcidin/ferritin ratio, WBC: White Blood Cells, LYM: lymphocyte, GRA: granulocytes, RBC: Red Blood Cells, HGB: Hemoglobin, HCT: Hematocrit, MCV: Mean Red Cell Volume, MCH: Mean Cell Hemoglobin, MCHC: Mean Cell Hemoglobin Concentration, RDW: Red Cell Distribution Width, PLT: Platelets, and MPV: Mean Platelet Volume.

**TABLE S2 Genotype and allele frequencies of Transmembrane Protease, Serine 6 (*TMPRSS6*), and BTB domain-containing protein gene (*BTBD*) stratified by sex**

| <b>rs855791</b>  | <b>Genotype</b> |            |            | <b>P-value</b> | <b>Alleles</b> |          | <b>P-value</b> |
|------------------|-----------------|------------|------------|----------------|----------------|----------|----------------|
|                  | <b>A/A</b>      | <b>A/G</b> | <b>G/G</b> |                | <b>A</b>       | <b>G</b> |                |
| All              | 108 (55)        | 89 (45)    | 0 (0.0)    | ---            | 305 (77)       | 89 (23)  | ---            |
| Female           | 10 (56)         | 8 (44)     | 0 (0.0)    | 0.947          | 28 (78)        | 8 (22)   | 0.956          |
| Male             | 98 (55)         | 81 (45)    | 0 (0.0)    |                | 277 (77)       | 81 (23)  | ---            |
| <b>rs9357271</b> | <b>C/C</b>      | <b>C/T</b> | <b>T/T</b> | <b>P-value</b> | <b>C</b>       | <b>T</b> | <b>P-value</b> |
| All              | 30 (15)         | 85 (43)    | 82 (42)    | ---            | 145 (37)       | 249 (63) | ---            |
| Female           | 1 (6)           | 7 (39)     | 10 (56)    | 0.328          | 9 (25)         | 27 (75)  | 0.123          |
| Male             | 29 (16)         | 78 (44)    | 72 (40)    |                | 136 (38)       | 222 (62) | ---            |

Data are shown as number (percentage). A Chi-square test was used for analysis.
